# Supplementary material
Source: PubMed Central journal article supplement (PMC3697668)
Supplement: JCM.00157-13_zjm999092663so1.pdf [file JCM.00157-13_zjm999092663so1.pdf]

**Table S1. Rates of total and resistant Gram-positive isolates collected from pediatric patients as part of T.E.S.T. 2004-2011.**

|                                    | <u>Africa</u> |      | <u>Asia/Pacific Rim</u> |      | <u>Europe</u> |      | <u>Latin America</u> |      | <u>Middle East</u> |      | <u>North America</u> |      | <u>Global</u> |      |
|------------------------------------|---------------|------|-------------------------|------|---------------|------|----------------------|------|--------------------|------|----------------------|------|---------------|------|
|                                    | n/N           | %    | n/N                     | %    | n/N           | %    | n/N                  | %    | n/N                | %    | n/N                  | %    | n/N           | %    |
| MR <i>Staphylococcus aureus</i>    | 18/100        | 18.0 | 61/183                  | 33.3 | 166/1384      | 12.0 | 170/465              | 36.6 | 21/136             | 15.4 | 548/1346             | 40.7 | 984/3614      | 27.2 |
| PR <i>Streptococcus pneumoniae</i> | 34/98         | 34.7 | 72/173                  | 41.6 | 184/1375      | 13.4 | 66/356               | 18.5 | 40/182             | 22.0 | 285/1189             | 24.0 | 681/3373      | 20.2 |
| VR <i>Enterococcus faecium</i>     | 0/3           | -    | 4/30                    | 13.3 | 8/83          | 9.6  | 24/58                | 41.4 | 0/13               | -    | 32/80                | 40.0 | 68/267        | 25.5 |

n = number of resistant isolates; N = total number of isolates.

MR = methicillin-resistant; PR = penicillin-resistant; VR = vancomycin-resistant.

% data are not given (-) where N <20.

**Table S2. Statistically significant changes in susceptibility among Gram-positive isolates collected from pediatric patients as part of T.E.S.T. 2004-2011.**

|                                 | <b>Region</b>    | <b>Antimicrobial</b> | <b>Change in Susceptibility</b> |
|---------------------------------|------------------|----------------------|---------------------------------|
| <i>Staphylococcus aureus</i>    | Asia-Pacific Rim | Levofloxacin         | p<0.01                          |
|                                 | Latin America    | AMOX-CLAV            | p<0.01                          |
|                                 | Middle East      | Meropenem            | p<0.001 (-)                     |
|                                 | North America    | AMOX-CLAV            | p<0.0001                        |
|                                 |                  | PIP-TAZ              | p<0.001                         |
|                                 | Global           | Ampicillin           | p<0.0001 (-)                    |
|                                 |                  | Penicillin           | p<0.0001 (-)                    |
| <i>Streptococcus pneumoniae</i> | Asia-Pacific Rim | AMOX-CLAV            | p<0.0001                        |
|                                 |                  | Azithromycin         | p<0.01                          |
|                                 |                  | Ceftriaxone          | p<0.0001                        |
|                                 |                  | Clarithromycin       | p<0.01                          |
|                                 |                  | Clindamycin          | p<0.01                          |
|                                 |                  | Erythromycin         | p<0.01                          |
|                                 |                  | Minocycline          | p<0.0001                        |
|                                 |                  | Penicillin           | p<0.01                          |
|                                 | Europe           | AMOX-CLAV            | p<0.01                          |
|                                 |                  | Ceftriaxone          | p<0.01                          |
|                                 |                  | Minocycline          | p<0.0001                        |
|                                 |                  | Tigecycline          | p<0.0001 (-)                    |
|                                 | Latin America    | Minocycline          | p<0.0001                        |
|                                 | Middle East      | Minocycline          | p<0.001                         |
|                                 | North America    | AMOX-CLAV            | p<0.001                         |
|                                 |                  | Ceftriaxone          | p<0.0001                        |
|                                 |                  | Clindamycin          | p<0.01                          |
|                                 |                  | Erythromycin         | p<0.01                          |
|                                 |                  | Minocycline          | p<0.0001                        |
|                                 |                  | Global               | Ceftriaxone                     |
| Imipenem                        |                  |                      | p<0.001 (-)                     |
| Meropenem                       |                  |                      | p<0.01 (-)                      |
| Minocycline                     | p<0.0001         |                      |                                 |
| Tigecycline                     | p<0.01 (-)       |                      |                                 |
| <i>Enterococcus faecalis</i>    | Europe           | Minocycline          | p<0.001                         |
|                                 | Global           | Ampicillin           | p<0.01                          |
|                                 |                  | Minocycline          | p<0.001                         |
|                                 |                  | Penicillin           | p<0.01                          |
| <i>Enterococcus faecium</i>     | Global           | Linezolid            | p<0.01 (-)                      |
|                                 |                  | Penicillin           | p<0.01                          |

(-) indicates a significant increases in susceptibility between 2004 and 2011.

**Table S3a. Antimicrobial susceptibility (%S) by patient age for Gram-positive isolates collected from pediatric patients as part of T.E.S.T. 2004-2011.**

|                  | N    | AMOX-<br>CLAV | Ampicillin | Ceftriaxone | Imipenem<br>(n) | Levofloxacin | Linezolid | Meropenem<br>(n) | Minocycline | Penicillin | PIP-<br>TAZ | Tigecycline | Vancomycin |
|------------------|------|---------------|------------|-------------|-----------------|--------------|-----------|------------------|-------------|------------|-------------|-------------|------------|
| <i>S. aureus</i> |      |               |            |             |                 |              |           |                  |             |            |             |             |            |
| Africa           |      |               |            |             |                 |              |           |                  |             |            |             |             |            |
| 1-5 years        | 50   | 80.0          | 6.0        | 78.0        | - (12)          | 86.0         | 100       | 92.1 (38)        | 98.0        | 6.0        | 84.0        | 100         | 100        |
| 6-12 years       | 26   | 88.5          | 3.8        | 88.5        | - (12)          | 96.2         | 100       | - (14)           | 100         | 3.8        | 88.5        | 100         | 100        |
| Asia/Pacific     |      |               |            |             |                 |              |           |                  |             |            |             |             |            |
| Rim              |      |               |            |             |                 |              |           |                  |             |            |             |             |            |
| 1-5 years        | 74   | 74.3          | 5.4        | 70.3        | - (17)          | 75.7         | 100       | 73.7 (57)        | 93.2        | 5.4        | 77.0        | 100         | 100        |
| 6-12 years       | 37   | 56.8          | 5.4        | 56.8        | - (9)           | 73.0         | 100       | 67.9 (28)        | 81.1        | 5.4        | 59.5        | 100         | 100        |
| 13-17 years      | 43   | 76.7          | 9.3        | 76.7        | - (8)           | 72.1         | 100       | 82.9 (35)        | 95.3        | 9.3        | 79.1        | 100         | 100        |
| Europe           |      |               |            |             |                 |              |           |                  |             |            |             |             |            |
| 1-5 years        | 488  | 91.2          | 17.0       | 89.1        | 97.6 (83)       | 92.2         | 100       | 97.0 (405)       | 98.8        | 14.3       | 93.9        | 100         | 100        |
| 6-12 years       | 407  | 91.2          | 16.5       | 90.7        | 96.6 (59)       | 90.7         | 100       | 95.4 (348)       | 97.5        | 13.8       | 93.9        | 100         | 100        |
| 13-17 years      | 277  | 90.6          | 13.0       | 89.2        | 100 (40)        | 86.6         | 100       | 95.4 (237)       | 98.2        | 11.6       | 93.5        | 100         | 100        |
| Latin America    |      |               |            |             |                 |              |           |                  |             |            |             |             |            |
| 1-5 years        | 172  | 70.9          | 9.3        | 68.0        | 86.4 (22)       | 77.9         | 100       | 86 (150)         | 98.8        | 6.4        | 76.7        | 100         | 100        |
| 6-12 years       | 115  | 64.3          | 5.2        | 64.3        | - (16)          | 77.4         | 100       | 81.8 (99)        | 99.1        | 5.2        | 67.0        | 100         | 100        |
| 13-17 years      | 101  | 68.3          | 7.9        | 70.3        | - (9)           | 75.2         | 100       | 75.0 (92)        | 98.0        | 5.9        | 73.3        | 100         | 100        |
| Middle East      |      |               |            |             |                 |              |           |                  |             |            |             |             |            |
| 1-5 years        | 51   | 90.2          | 7.8        | 90.2        | - (5)           | 92.2         | 100       | 97.8 (46)        | 100         | 7.8        | 94.1        | 100         | 100        |
| 6-12 years       | 41   | 100           | 14.6       | 92.7        | - (7)           | 95.1         | 100       | 100 (34)         | 97.6        | 12.2       | 100         | 100         | 100        |
| 13-17 years      | 29   | 79.3          | 6.9        | 75.9        | - (5)           | 86.2         | 100       | 83.3 (24)        | 100         | 3.4        | 82.8        | 100         | 100        |
| North America    |      |               |            |             |                 |              |           |                  |             |            |             |             |            |
| 1-5 years        | 592  | 64.5          | 9.0        | 60.5        | 99.0 (192)      | 79.4         | 100       | 97.0 (400)       | 99.7        | 7.1        | 73.0        | 100         | 100        |
| 6-12 years       | 324  | 72.8          | 9.9        | 71.6        | 99.1 (110)      | 80.6         | 100       | 93.9 (214)       | 99.1        | 8.6        | 79.9        | 100         | 100        |
| 13-17 years      | 307  | 69.4          | 10.4       | 66.4        | 96.6 (117)      | 78.8         | 100       | 93.2 (190)       | 98.7        | 9.1        | 74.3        | 100         | 100        |
| Global           |      |               |            |             |                 |              |           |                  |             |            |             |             |            |
| 1-5 years        | 1427 | 76.4          | 11.4       | 73.4        | 96.7 (331)      | 84.1         | 100       | 94.2 (1096)      | 98.9        | 9.4        | 81.9        | 100         | 100        |
| 6-12 years       | 950  | 80.6          | 12.0       | 79.7        | 95.3 (213)      | 85.3         | 100       | 92.3 (737)       | 97.7        | 10.3       | 84.6        | 100         | 100        |
| 13-17 years      | 768  | 78.0          | 10.7       | 76.4        | 96.7 (181)      | 81.3         | 100       | 90.1 (587)       | 98.2        | 9.2        | 81.9        | 100         | 100        |

|                      | N    | AMOX-CLAV | Ampicillin | Ceftriaxone | Imipenem (n) | Levofloxacin | Linezolid | Meropenem (n) | Minocycline | Penicillin | PIP-TAZ | Tigecycline | Vancomycin |
|----------------------|------|-----------|------------|-------------|--------------|--------------|-----------|---------------|-------------|------------|---------|-------------|------------|
| <i>S. pneumoniae</i> |      |           |            |             |              |              |           |               |             |            |         |             |            |
| Africa               |      |           |            |             |              |              |           |               |             |            |         |             |            |
| 1-5 years            | 71   | 76.1      | NA         | 91.5        | - (17)       | 100          | 100       | 50.0 (54)     | 77.5        | 14.1       | NA      | 95.8        | 100        |
| Asia/Pacific Rim     |      |           |            |             |              |              |           |               |             |            |         |             |            |
| 1-5 years            | 104  | 73.1      | NA         | 74.0        | 81.0 (21)    | 99.0         | 100       | 42.2 (83)     | 39.4        | 30.8       | NA      | 100         | 100        |
| 6-12 years           | 45   | 73.3      | NA         | 77.8        | - (4)        | 100          | 100       | 46.3 (41)     | 40.0        | 40.0       | NA      | 100         | 100        |
| Europe               |      |           |            |             |              |              |           |               |             |            |         |             |            |
| 1-5 years            | 919  | 94.5      | NA         | 94.8        | 85.9 (128)   | 100          | 100       | 83.1 (791)    | 65.8        | 63.7       | NA      | 98.4        | 100        |
| 6-12 years           | 285  | 94.7      | NA         | 95.1        | 97.3 (37)    | 99.6         | 100       | 83.1 (248)    | 66.3        | 71.2       | NA      | 98.2        | 100        |
| 13-17 years          | 83   | 95.2      | NA         | 94.0        | - (12)       | 98.8         | 100       | 83.1 (71)     | 79.5        | 77.1       | NA      | 98.8        | 100        |
| Latin America        |      |           |            |             |              |              |           |               |             |            |         |             |            |
| 1-5 years            | 216  | 91.7      | NA         | 94.0        | 81.8 (22)    | 99.5         | 100       | 72.7 (194)    | 69.0        | 45.4       | NA      | 99.1        | 100        |
| 6-12 years           | 92   | 94.6      | NA         | 95.7        | - (12)       | 98.9         | 100       | 78.8 (80)     | 65.2        | 48.9       | NA      | 96.7        | 100        |
| 13-17 years          | 29   | 100       | NA         | 89.7        | - (4)        | 100          | 100       | 72.0 (25)     | 72.4        | 51.7       | NA      | 96.6        | 100        |
| Middle East          |      |           |            |             |              |              |           |               |             |            |         |             |            |
| 1-5 years            | 119  | 88.2      | NA         | 92.4        | - (2)        | 100          | 100       | 71.8 (117)    | 56.3        | 40.3       | NA      | 99.2        | 100        |
| 6-12 years           | 33   | 87.9      | NA         | 87.9        | - (1)        | 100          | 100       | 75.0 (32)     | 66.7        | 51.5       | NA      | 100         | 100        |
| North America        |      |           |            |             |              |              |           |               |             |            |         |             |            |
| 1-5 years            | 766  | 80.9      | NA         | 91.5        | 61.9 (307)   | 99.9         | 100       | 66.0 (459)    | 75.3        | 45.4       | NA      | 97.9        | 100        |
| 6-12 years           | 266  | 88.0      | NA         | 96.2        | 66.4 (119)   | 99.6         | 100       | 83.7 (147)    | 83.1        | 60.5       | NA      | 100         | 100        |
| 13-17 years          | 104  | 87.5      | NA         | 95.2        | 69.8 (43)    | 99.0         | 100       | 73.8 (61)     | 79.8        | 53.8       | NA      | 99.0        | 100        |
| Global               |      |           |            |             |              |              |           |               |             |            |         |             |            |
| 1-5 years            | 2195 | 87.5      | NA         | 92.3        | 69.4 (497)   | 99.9         | 100       | 73.4 (1698)   | 68.1        | 51.1       | NA      | 98.3        | 100        |
| 6-12 years           | 736  | 90.6      | NA         | 94.3        | 71.9 (178)   | 99.6         | 99.9      | 79.2 (558)    | 70.9        | 60.6       | NA      | 98.9        | 100        |
| 13-17 years          | 243  | 91.8      | NA         | 93.8        | 74.6 (59)    | 98.4         | 100       | 74.5 (184)    | 74.1        | 60.1       | NA      | 98.8        | 100        |
| <i>S. agalactiae</i> |      |           |            |             |              |              |           |               |             |            |         |             |            |
| Europe               |      |           |            |             |              |              |           |               |             |            |         |             |            |
| 1-5 years            | 88   | NA        | 100        | 100         | NA           | 100          | 100       | 100 (77)      | 9.1         | 100        | NA      | 98.9        | 100        |
| 6-12 years           | 45   | NA        | 100        | 100         | NA           | 100          | 100       | 100 (38)      | 22.2        | 100        | NA      | 100         | 100        |
| 13-17 years          | 54   | NA        | 100        | 100         | NA           | 100          | 100       | 100 (43)      | 25.9        | 100        | NA      | 100         | 100        |
| Latin America        |      |           |            |             |              |              |           |               |             |            |         |             |            |
| 1-5 years            | 38   | NA        | 100        | 100         | NA           | 100          | 100       | 100 (34)      | 21.1        | 100        | NA      | 100         | 100        |

|                    | N   | AMOX-CLAV | Ampicillin | Ceftriaxone | Imipenem (n) | Levofloxacin | Linezolid | Meropenem (n) | Minocycline | Penicillin | PIP-TAZ | Tigecycline | Vancomycin |
|--------------------|-----|-----------|------------|-------------|--------------|--------------|-----------|---------------|-------------|------------|---------|-------------|------------|
| 6-12 years         | 20  | NA        | 100        | 100         | NA           | 100          | 100       | 100 (20)      | 15.0        | 100        | NA      | 100         | 100        |
| 13-17 years        | 22  | NA        | 100        | 100         | NA           | 95.5         | 100       | - (19)        | 27.3        | 100        | NA      | 100         | 100        |
| North America      |     |           |            |             |              |              |           |               |             |            |         |             |            |
| 1-5 years          | 121 | NA        | 100        | 100         | NA           | 100          | 100       | 100 (76)      | 9.9         | 100        | NA      | 100         | 100        |
| 6-12 years         | 64  | NA        | 100        | 100         | NA           | 100          | 100       | 100 (37)      | 18.8        | 100        | NA      | 100         | 100        |
| 13-17 years        | 127 | NA        | 100        | 100         | NA           | 100          | 100       | 100 (76)      | 19.7        | 100        | NA      | 99.2        | 100        |
| Global             |     |           |            |             |              |              |           |               |             |            |         |             |            |
| 1-5 years          | 270 | NA        | 100        | 100         | NA           | 99.6         | 100       | 100 (208)     | 12.2        | 100        | NA      | 98.5        | 100        |
| 6-12 years         | 143 | NA        | 100        | 100         | NA           | 100          | 100       | 100 (108)     | 21.0        | 100        | NA      | 100         | 100        |
| 13-17 years        | 221 | NA        | 100        | 100         | NA           | 99.1         | 100       | 100 (156)     | 21.7        | 100        | NA      | 99.5        | 100        |
| <i>E. faecalis</i> |     |           |            |             |              |              |           |               |             |            |         |             |            |
| Asia/Pacific Rim   |     |           |            |             |              |              |           |               |             |            |         |             |            |
| 1-5 years          | 22  | NA        | 100        | NA          | NA           | 86.4         | 95.5      | NA            | 27.3        | 100        | NA      | 100         | 100        |
| Europe             |     |           |            |             |              |              |           |               |             |            |         |             |            |
| 1-5 years          | 137 | NA        | 99.3       | NA          | NA           | 90.5         | 100       | NA            | 35.8        | 99.3       | NA      | 100         | 99.3       |
| 6-12 years         | 58  | NA        | 96.6       | NA          | NA           | 82.8         | 100       | NA            | 24.1        | 96.6       | NA      | 100         | 100        |
| 13-17 years        | 47  | NA        | 100        | NA          | NA           | 76.6         | 100       | NA            | 29.8        | 100        | NA      | 100         | 100        |
| Latin America      |     |           |            |             |              |              |           |               |             |            |         |             |            |
| 1-5 years          | 80  | NA        | 100        | NA          | NA           | 80.0         | 100       | NA            | 27.5        | 98.8       | NA      | 100         | 100        |
| 6-12 years         | 42  | NA        | 100        | NA          | NA           | 81.0         | 100       | NA            | 19.0        | 100        | NA      | 100         | 100        |
| North America      |     |           |            |             |              |              |           |               |             |            |         |             |            |
| 1-5 years          | 226 | NA        | 99.6       | NA          | NA           | 93.8         | 100       | NA            | 35.0        | 99.6       | NA      | 99.1        | 100        |
| 6-12 years         | 70  | NA        | 100        | NA          | NA           | 90.0         | 100       | NA            | 37.1        | 100        | NA      | 98.6        | 100        |
| 13-17 years        | 47  | NA        | 100        | NA          | NA           | 85.1         | 100       | NA            | 34.0        | 100        | NA      | 97.9        | 97.9       |
| Global             |     |           |            |             |              |              |           |               |             |            |         |             |            |
| 1-5 years          | 488 | NA        | 99.6       | NA          | NA           | 88.5         | 99.8      | NA            | 34.0        | 99.4       | NA      | 99.6        | 99.8       |
| 6-12 years         | 193 | NA        | 99.0       | NA          | NA           | 82.4         | 100       | NA            | 28.5        | 99.0       | NA      | 99.5        | 100        |
| 13-17 years        | 128 | NA        | 100        | NA          | NA           | 78.9         | 100       | NA            | 37.5        | 100        | NA      | 99.2        | 99.2       |
| <i>E. faecium</i>  |     |           |            |             |              |              |           |               |             |            |         |             |            |
| Europe             |     |           |            |             |              |              |           |               |             |            |         |             |            |
| 1-5 years          | 38  | NA        | 31.6       | NA          | NA           | 42.1         | 100       | NA            | 63.2        | 26.3       | NA      | 100         | 86.8       |

|               | N   | AMOX-<br>CLAV | Ampicillin | Ceftriaxone | Imipenem<br>(n) | Levofloxacin | Linezolid | Meropenem<br>(n) | Minocycline | Penicillin | PIP-<br>TAZ | Tigecycline | Vancomycin |
|---------------|-----|---------------|------------|-------------|-----------------|--------------|-----------|------------------|-------------|------------|-------------|-------------|------------|
| Latin America |     |               |            |             |                 |              |           |                  |             |            |             |             |            |
| 1-5 years     | 28  | NA            | 28.6       | NA          | NA              | 32.1         | 100       | NA               | 57.1        | 21.4       | NA          | 100         | 60.7       |
| North America |     |               |            |             |                 |              |           |                  |             |            |             |             |            |
| 1-5 years     | 35  | NA            | 51.4       | NA          | NA              | 45.7         | 94.3      | NA               | 71.4        | 48.6       | NA          | 100         | 74.3       |
| Global        |     |               |            |             |                 |              |           |                  |             |            |             |             |            |
| 1-5 years     | 125 | NA            | 32.8       | NA          | NA              | 35.2         | 98.4      | NA               | 64.8        | 28.0       | NA          | 100         | 76.0       |
| 6-12 years    | 46  | NA            | 17.4       | NA          | NA              | 30.4         | 100       | NA               | 67.4        | 17.4       | NA          | 100         | 65.2       |
| 13-17 years   | 51  | NA            | 21.6       | NA          | NA              | 17.6         | 94.1      | NA               | 70.6        | 15.7       | NA          | 100         | 58.8       |

%S are not given (-) where N <20.

**Table S3b. Antimicrobial susceptibility (%S) for the macrolides and clindamycin against *S. pneumoniae* isolates collected from pediatric patients as part of T.E.S.T. 2004-2011.**

|                  | N    | Azithromycin | Clarithromycin | Erythromycin | Clindamycin |
|------------------|------|--------------|----------------|--------------|-------------|
| Africa           |      |              |                |              |             |
| 1-5 years        | 62   | 54.8         | 54.8           | 54.8         | 62.9        |
| Asia/Pacific Rim |      |              |                |              |             |
| 1-5 years        | 89   | 31.5         | 32.6           | 31.5         | 56.2        |
| 6-12 years       | 34   | 29.4         | 29.4           | 29.4         | 41.2        |
| Europe           |      |              |                |              |             |
| 1-5 years        | 843  | 64.3         | 64.5           | 63.9         | 76.0        |
| 6-12 years       | 258  | 65.1         | 65.5           | 64.7         | 74.0        |
| 13-17 years      | 72   | 69.4         | 69.4           | 69.4         | 80.6        |
| Latin America    |      |              |                |              |             |
| 1-5 years        | 190  | 66.8         | 65.8           | 66.3         | 84.2        |
| 6-12 years       | 80   | 63.8         | 63.8           | 62.5         | 91.3        |
| 13-17 years      | 26   | 69.2         | 69.2           | 69.2         | 96.2        |
| Middle East      |      |              |                |              |             |
| 1-5 years        | 109  | 67.0         | 67.0           | 67.0         | 84.4        |
| 6-12 years       | 29   | 69.0         | 69.0           | 69.0         | 82.8        |
| North America    |      |              |                |              |             |
| 1-5 years        | 670  | 54.5         | 54.6           | 54.0         | 73.6        |
| 6-12 years       | 234  | 68.8         | 69.7           | 67.9         | 83.3        |
| 13-17 years      | 87   | 58.6         | 58.6           | 58.6         | 82.8        |
| Global           |      |              |                |              |             |
| 1-5 years        | 1963 | 59.6         | 59.7           | 59.2         | 75.1        |
| 6-12 years       | 649  | 64.3         | 64.7           | 63.6         | 77.8        |
| 13-17 years      | 212  | 63.2         | 63.2           | 63.2         | 81.1        |

%S are not given (-) where N <20.

**Table S4. MIC<sub>90</sub> (mg/L) and antimicrobial susceptibility (%S) for the macrolides and clindamycin against *S. pneumoniae* isolates collected from pediatric patients as part of T.E.S.T. 2004-2011.**

|                                 | <u>Africa</u>     |      | <u>Asia/Pacific Rim</u> |      | <u>Europe</u>     |      | <u>Latin America</u> |      | <u>Middle East</u> |      | <u>North America</u> |      | <u>Global</u>     |      |
|---------------------------------|-------------------|------|-------------------------|------|-------------------|------|----------------------|------|--------------------|------|----------------------|------|-------------------|------|
|                                 | MIC <sub>90</sub> | %S   | MIC <sub>90</sub>       | %S   | MIC <sub>90</sub> | %S   | MIC <sub>90</sub>    | %S   | MIC <sub>90</sub>  | %S   | MIC <sub>90</sub>    | %S   | MIC <sub>90</sub> | %S   |
| <i>Streptococcus pneumoniae</i> | N = 87            |      | N = 147                 |      | N = 1251          |      | N = 314              |      | N = 168            |      | N = 1042             |      | N = 3009          |      |
| Azithromycin                    | ≥128              | 58.6 | ≥128                    | 34.7 | 64                | 64.7 | 64                   | 67.2 | 64                 | 68.5 | ≥128                 | 58.1 | ≥128              | 61.2 |
| Clarithromycin                  | ≥128              | 58.6 | ≥128                    | 35.4 | 64                | 65.0 | 64                   | 66.6 | 64                 | 68.5 | ≥128                 | 58.3 | ≥128              | 61.4 |
| Erythromycin                    | ≥128              | 58.6 | ≥128                    | 34.7 | 64                | 64.4 | 64                   | 66.6 | 64                 | 68.5 | ≥128                 | 57.5 | ≥128              | 60.9 |
| Clindamycin                     | ≥128              | 65.5 | ≥128                    | 54.4 | ≥128              | 75.9 | ≥128                 | 87.6 | ≥128               | 83.9 | ≥128                 | 76.7 | ≥128              | 76.5 |



**Table S5. Antimicrobial susceptibility (%S) by collection source for the macrolides and clindamycin against *S. pneumoniae* isolates collected from pediatric patients as part of T.E.S.T. 2004-2011.**

|               | N    | Azithromycin | Clarithromycin | Erythromycin | Clindamycin |
|---------------|------|--------------|----------------|--------------|-------------|
| Bodily fluids | 192  | 67.2         | 66.7           | 67.2         | 79.2        |
| CNS           | 24   | 70.8         | 70.8           | 70.8         | 100         |
| CVS           | 609  | 71.8         | 71.6           | 71.4         | 83.3        |
| HEENT         | 1169 | 59.5         | 59.7           | 58.9         | 75.2        |
| Integumentary | 41   | 58.5         | 61.0           | 58.5         | 78.0        |
| Respiratory   | 925  | 55.0         | 55.2           | 54.6         | 72.5        |

CNS, central nervous system; CVS, cardiovascular system; HEENT, head, ears, eyes, nose and throat.

%S are not given (-) where N <20.
